# Supplementary material for: Structural characterization of coatomer in its cytosolic state
Source: PubMed Central journal article supplement (PMC4980336; doi:10.1007/s13238-016-0296-z), 2016-07-29
Supplement: 13238_2016_296_MOESM1_ESM.pdf [file 13238_2016_296_MOESM1_ESM.pdf]

## SUPPLEMENTAL TEXT

### ***Effect of membrane cholesterol COPI vesicle formation***

A previous study had found cholesterol to be relatively depleted from COPI vesicles reconstituted from Golgi membrane (Brugger et al., 2000). Thus, we also examined how cholesterol affects vesicle formation using liposomal membrane. The molar ratios of cholesterol to total phospholipids are 1:10 for ER membrane, 1:5 for Golgi membrane, 1:2 for endosome membrane and 1:1 for plasma membrane. We thus generated liposomes at various relative cholesterol levels (0:1, 1:10, 1:5, 1:2 and 1:1 respectively) and used these liposomes for vesiculation assay and the subsequent EM observations. For each vesiculation reaction, we performed three independent experiments and prepared three EM grids. And for each grid, we randomly selected five squares and recorded 18 micrographs for each square. During image processing, all the micrographs were merged into one dataset to perform particle picking and reference-free 2D classification. After that, the vesicle numbers per micrographs and the corresponding micrograph names were extracted for further statistical analysis

We investigated the number of vesicles per micrograph, and found that there was a dramatic decrease of vesiculation efficiency when the cholesterol level increased above 1:5 (**Figure S4A**), which is the cholesterol ratio predicted for Golgi membrane (van Meer et al., 2008). Further analysis showed that the size of vesicles was also affected, with diameters becoming larger with increase in cholesterol concentration (**Figure S4B**). Notably, these findings are consistent with a previous finding that COPI vesicles reconstituted from Golgi membrane have relatively depleted level of cholesterol (Brugger et al., 2000). As such, our cholesterol data supports the use of liposomal membrane to assay for COPI vesicle formation as a way of testing the functionality of the recombinant coatomer that we have generated for the current study.

## SUPPLEMENTAL METHODS

### ***Preparations of liposomes***

Pure lipids were purchased from Avanti Polar lipids. Lipids were dissolved and mixed in either chloroform or methanol with cholesterol-gradient composition. The molar ratio of cholesterol to total phospholipids was set to 0:1, 1:10, 1:5, 1:2 and 1:1, which can also be represented by molar ratio of cholesterol to total lipids: 0 mol% (ratio: 0:1), 8 mol% (ratio: 1:10), 16 mol% (ratio: 1:5), 42 mol% (ratio: 1:2) and 83 mol% (ratio: 1:1). For phospholipids (DOPC/DOPE/DOPS/DOPI/SM), their relative proportions were set to be similar to that of Golgi membrane (van Meer, 1998; van Meer et al., 2008). After evaporation, the dry lipid film was suspended and hydrated in Assay buffer (25 mM Hepes, pH 7.2, 25 mM KCl, 2.5 mM Mg(OAc)<sub>2</sub>). After vortexing and repeated freezing/thawing, liposomes were further extruded through polycarbonate filter with 0.2 μm pore.

### ***In vitro membrane binding and vesiculation assay***

Incubation was carried out in 50 μl AS buffer (25 mM Hepes, pH 7.2, 25 mM KCl, 0.2 M sucrose, 2.5 mM Mg(OAc)<sub>2</sub>) for 30 min at 37°C with myr-Arf1 (4.8 μM), coatamer (182 nM), GTPγS (25 μM) and liposome (0.2 mg/ml).

### ***Negative stain electron microscopy***

After incubation, the reaction solutions were directly applied onto glow-discharged EM grids (LifeTrust) coated with continuous carbon film and stained with 2% (w/v) uranyl acetate for 1 min at RT.

Images were collected on a 200kV FEI F200C Talos field emission transmission electron microscope equipped with a 4k×4K Ceta charge-coupled device camera (FEI, Netherlands) at magnification of 57,000 fold with a pixel size of 1.81 Å.

## SUPPLEMENTAL FIGURE LEGEND

**Figure S1. Coatomer purification and subunit detection.** The subunits with different tags are indicated accordingly.

**Figure S2. SDS-PAGE of purified myristoylated Arf1 and ArfGAP1.** (A) Coomassie-blue stained SDS-PAGE of myristoylated Arf1 eluted from Mono S chromatography. The fractions indicated, which contains only myristoylated Arf1, were pooled for further functional assays. (B) Coomassie-blue stained SDS-PAGE of ArfGAP1 eluted from Strep II affinity chromatography.

**Figure S3. Characterizing vesiculated liposomes as COPI vesicles.** (A) Negative-stain EM image of the purified vesicles from sucrose density sedimentation. Two vesicles are selected and magnified in the insets. The white scale-bar for the whole image is 500 nm. The black scale-bar in the inset is 100 nm. (B) Western blotting analysis of the purified vesicles.

**Figure S4. Effect of cholesterol on COPI vesicle formation.** (A) Statistical histogram of vesicle number vs. different concentrations of cholesterol. All error bars represent s.d. from three independent vesicle reconstitution experiments. For each experiment, N = 90. The statistical significances of differences are expressed as \*\* for  $p < 0.01$  and \* for  $p < 0.05$ . (B) Statistical histograms of the vesicle number vs. vesicle diameters for different concentrations of cholesterol. All error bars represent s.d. from three independent vesicle reconstitution experiments. For each experiment, N = 90.

**Figure S5. Negative-stain EM analysis of the recombinant human coatomer.** (A) Raw image of negatively stained coatomer with the individual particles circled; scale bar, 50 nm. (B) 2D class averages of the negatively stained coatomer, box size = 30 nm. (C) Representative 2D class averages showing the two major parts of coatomer described in the text with some flexible extra densities extending outside these two parts as indicated by the schematic below. Arrows point to potential dynamic parts of coatomer.

**Figure S6. 3D reconstruction of the recombinant human coatomer.** (A) “Focus” refinement process (see also **MATERIALS AND METHODS**). The iso-surface (displayed at levels corresponding to the volume of a single coatomer complex or as separated subcomplexes) and the ortho-slices are both displayed. (B) FSC curves of 3D reconstructions.

**Figure S7. “Focus” classification of the adaptor F-subcomplex.** The iso-surface (displayed at the same level corresponding to the volume of the F-subcomplex) and the ortho-slices are both displayed.

**Table S1. Mass spectrometry analysis for identifying the degraded fragment of  $\delta$ -COP.**

| Start | End | Observed  | Mr(expt)  | Mr(calc)  | ppm  | Peptide                                      |
|-------|-----|-----------|-----------|-----------|------|----------------------------------------------|
| 1     | 14  | 1433.0720 | 1432.0647 | 1431.7942 | 189  | -.MVLLAAAVCTKAGK.A                           |
| 20    | 26  | 910.6010  | 909.5937  | 909.4378  | 171  | R.QFVEMTR.T                                  |
| 27    | 38  | 1316.0470 | 1315.0397 | 1314.7659 | 208  | R.TRIEGLLAAPFK.L                             |
| 39    | 55  | 1977.3640 | 1976.3567 | 1975.9786 | 191  | K.LMNTGKQHTFVETESVR.Y                        |
| 39    | 55  | 1993.3470 | 1992.3397 | 1991.9735 | 184  | K.LMNTGKQHTFVETESVR.Y +<br>Oxidation (M)     |
| 45    | 55  | 1332.9480 | 1331.9407 | 1331.6470 | 221  | K.QHTFVETESVR.Y                              |
| 56    | 63  | 1057.7290 | 1056.7217 | 1056.4950 | 215  | R.YVYQPM EK.L                                |
| 64    | 72  | 1081.7970 | 1080.7897 | 1080.6253 | 152  | K.LYMVLITTK.N                                |
| 73    | 84  | 1417.0550 | 1416.0477 | 1415.7256 | 228  | K.NSNILEDLETLR.L                             |
| 89    | 95  | 936.6520  | 935.6447  | 935.4535  | 204  | R.VIPEYCR.A                                  |
| 132   | 145 | 1756.1550 | 1755.1477 | 1754.7934 | 202  | R.TFTEMDSHEEKVFR.A                           |
| 132   | 145 | 1772.1530 | 1771.1457 | 1770.7883 | 202  | R.TFTEMDSHEEKVFR.A + Oxidation<br>(M)        |
| 211   | 223 | 1234.9910 | 1233.9837 | 1233.6830 | 244  | K.VAPAPARPSGPSK.A                            |
| 287   | 307 | 2384.3280 | 2383.3207 | 2383.0970 | 93.9 | R.DGGLQNMELHGMIMLHISDEK.F +<br>Oxidation (M) |

**Table S2. Identified cross-linked residues and their Ca-Ca distance measured in the membrane-bound coatomer model (Distances greater than the cut-off value of 45 Å are colored in red).**

| No. | Subunit1            | AA   | Domain 1                           | Subunit2   | AA   | Domain2                            | ID Score | Distance |
|-----|---------------------|------|------------------------------------|------------|------|------------------------------------|----------|----------|
|     | <b>Intra-domain</b> |      |                                    |            |      |                                    |          |          |
| 1   | $\alpha$            | 8    | 1st $\beta$ -propeller             | $\alpha$   | 46   | 1st $\beta$ -propeller             | 156      | 14       |
| 2   | $\alpha$            | 198  | 1st $\beta$ -propeller             | $\alpha$   | 238  | 1st $\beta$ -propeller             | 53       | 13       |
| 3   | $\alpha$            | 446  | 2 <sup>nd</sup> $\beta$ -propeller | $\alpha$   | 480  | 2 <sup>nd</sup> $\beta$ -propeller | 341      | 19       |
| 4   | $\alpha$            | 411  | 2 <sup>nd</sup> $\beta$ -propeller | $\alpha$   | 441  | 2 <sup>nd</sup> $\beta$ -propeller | 235      | 14       |
| 5   | $\alpha$            | 411  | 2 <sup>nd</sup> $\beta$ -propeller | $\alpha$   | 438  | 2 <sup>nd</sup> $\beta$ -propeller | 109      | 14       |
| 6   | $\alpha$            | 350  | 2 <sup>nd</sup> $\beta$ -propeller | $\alpha$   | 398  | 2 <sup>nd</sup> $\beta$ -propeller | 95       | 24       |
| 7   | $\alpha$            | 337  | 2 <sup>nd</sup> $\beta$ -propeller | $\alpha$   | 362  | 2 <sup>nd</sup> $\beta$ -propeller | 28       | 8        |
| 8   | $\alpha$            | 707  | $\alpha$ -solenoid                 | $\alpha$   | 727  | $\alpha$ -solenoid                 | 280      | 18       |
| 9   | $\alpha$            | 680  | $\alpha$ -solenoid                 | $\alpha$   | 707  | $\alpha$ -solenoid                 | 86       | 17       |
| 10  | $\alpha$            | 607  | $\alpha$ -solenoid                 | $\alpha$   | 616  | $\alpha$ -solenoid                 | 86       | 16       |
| 11  | $\alpha$            | 730  | $\alpha$ -solenoid                 | $\alpha$   | 736  | $\alpha$ -solenoid                 | 82       | 11       |
| 12  | $\alpha$            | 707  | $\alpha$ -solenoid                 | $\alpha$   | 736  | $\alpha$ -solenoid                 | 64       | 12       |
| 13  | $\alpha$            | 707  | $\alpha$ -solenoid                 | $\alpha$   | 724  | $\alpha$ -solenoid                 | 22       | 16       |
| 14  | $\alpha$            | 707  | $\alpha$ -solenoid                 | $\alpha$   | 730  | $\alpha$ -solenoid                 | 15       | 13       |
| 15  | $\alpha$            | 1123 | CTD                                | $\alpha$   | 1152 | CTD                                | 180      | 10       |
| 16  | $\alpha$            | 1084 | CTD                                | $\alpha$   | 1123 | CTD                                | 174      | 18       |
| 17  | $\alpha$            | 1002 | CTD                                | $\alpha$   | 1189 | CTD                                | 35       | 22       |
| 18  | $\alpha$            | 1080 | CTD                                | $\alpha$   | 1123 | CTD                                | 28       | 23       |
| 19  | $\alpha$            | 1081 | CTD                                | $\alpha$   | 1123 | CTD                                | 22       | 19       |
| 20  | $\beta'$            | 8    | 1 <sup>st</sup> $\beta$ -propeller | $\beta'$   | 10   | 1st $\beta$ -propeller             | 94       | 6        |
| 21  | $\beta'$            | 69   | 1st $\beta$ -propeller             | $\beta'$   | 131  | 1st $\beta$ -propeller             | 34       | 12       |
| 22  | $\beta'$            | 386  | 2 <sup>nd</sup> $\beta$ -propeller | $\beta'$   | 419  | 2 <sup>nd</sup> $\beta$ -propeller | 568      | 12       |
| 23  | $\beta'$            | 328  | 2 <sup>nd</sup> $\beta$ -propeller | $\beta'$   | 346  | 2 <sup>nd</sup> $\beta$ -propeller | 342      | 7        |
| 24  | $\beta'$            | 313  | 2 <sup>nd</sup> $\beta$ -propeller | $\beta'$   | 346  | 2 <sup>nd</sup> $\beta$ -propeller | 89       | 8        |
| 25  | $\beta'$            | 313  | 2 <sup>nd</sup> $\beta$ -propeller | $\beta'$   | 569  | 2 <sup>nd</sup> $\beta$ -propeller | 18       | 11       |
| 26  | $\beta'$            | 771  | $\alpha$ -solenoid                 | $\beta'$   | 779  | $\alpha$ -solenoid                 | 182      | 13       |
| 27  | $\epsilon$          | 42   | 1st $\beta$ -propeller             | $\epsilon$ | 74   | 1st $\beta$ -propeller             | 320      | 21       |
| 28  | $\epsilon$          | 278  | 1st $\beta$ -propeller             | $\epsilon$ | 288  | 1st $\beta$ -propeller             | 319      | 10       |
| 29  | $\epsilon$          | 158  | 1st $\beta$ -propeller             | $\epsilon$ | 288  | 1st $\beta$ -propeller             | 35       | 19       |
| 30  | $\epsilon$          | 278  | 1st $\beta$ -propeller             | $\epsilon$ | 293  | 1st $\beta$ -propeller             | 19       | 15       |
| 31  | $\beta$             | 36   | trunk                              | $\beta$    | 43   | trunk                              | 72       | 10       |
| 32  | $\beta$             | 501  | trunk                              | $\beta$    | 535  | trunk                              | 68       | 25       |

|                                         |          |     |                                    |          |      |                                    |     |    |
|-----------------------------------------|----------|-----|------------------------------------|----------|------|------------------------------------|-----|----|
| 33                                      | $\beta$  | 361 | trunk                              | $\beta$  | 366  | trunk                              | 62  | 9  |
| 34                                      | $\beta$  | 501 | trunk                              | $\beta$  | 534  | trunk                              | 32  | 26 |
| 35                                      | $\beta$  | 32  | trunk                              | $\beta$  | 37   | trunk                              | 31  | 7  |
| 36                                      | $\gamma$ | 514 | trunk                              | $\gamma$ | 538  | trunk                              | 49  | 17 |
| 37                                      | $\gamma$ | 465 | trunk                              | $\gamma$ | 540  | trunk                              | 31  | 23 |
| 38                                      | $\gamma$ | 145 | trunk                              | $\gamma$ | 175  | trunk                              | 25  | 11 |
| 39                                      | $\gamma$ | 175 | trunk                              | $\gamma$ | 213  | trunk                              | 24  | 15 |
| 40                                      | $\gamma$ | 262 | trunk                              | $\gamma$ | 300  | trunk                              | 21  | 13 |
| 41                                      | $\gamma$ | 205 | trunk                              | $\gamma$ | 238  | trunk                              | 17  | 16 |
| 42                                      | $\gamma$ | 238 | trunk                              | $\gamma$ | 313  | trunk                              | 17  | 16 |
| 43                                      | $\gamma$ | 604 | appendage                          | $\gamma$ | 818  | appendage                          | 36  | 35 |
| 44                                      | $\delta$ | 14  | NTD                                | $\delta$ | 38   | NTD                                | 37  | 9  |
| 45                                      | $\delta$ | 335 | $\mu$ homology                     | $\delta$ | 363  | $\mu$ homology                     | 214 | 15 |
| 46                                      | $\delta$ | 335 | $\mu$ homology                     | $\delta$ | 347  | $\mu$ homology                     | 199 | 12 |
| 47                                      | $\delta$ | 322 | $\mu$ homology                     | $\delta$ | 335  | $\mu$ homology                     | 118 | 19 |
| 48                                      | $\delta$ | 281 | $\mu$ homology                     | $\delta$ | 363  | $\mu$ homology                     | 111 | 12 |
| 49                                      | $\delta$ | 322 | $\mu$ homology                     | $\delta$ | 476  | $\mu$ homology                     | 102 | 19 |
| 50                                      | $\delta$ | 448 | $\mu$ homology                     | $\delta$ | 476  | $\mu$ homology                     | 26  | 19 |
| <b>Inter-domains but Intra-subunit</b>  |          |     |                                    |          |      |                                    |     |    |
| 51                                      | $\alpha$ | 4   | 1st $\beta$ -propeller             | $\alpha$ | 540  | 2 <sup>nd</sup> $\beta$ -propeller | 147 | 38 |
| 52                                      | $\alpha$ | 583 | 2 <sup>nd</sup> $\beta$ -propeller | $\alpha$ | 607  | $\alpha$ -solenoid                 | 144 | 43 |
| 53                                      | $\alpha$ | 583 | 2 <sup>nd</sup> $\beta$ -propeller | $\alpha$ | 616  | $\alpha$ -solenoid                 | 16  | 34 |
| 54                                      | $\alpha$ | 238 | 1st $\beta$ -propeller             | $\alpha$ | 1189 | CTD                                | 45  | 95 |
| 55                                      | $\alpha$ | 411 | 2 <sup>nd</sup> $\beta$ -propeller | $\alpha$ | 1002 | CTD                                | 31  | 41 |
| 56                                      | $\alpha$ | 411 | 2 <sup>nd</sup> $\beta$ -propeller | $\alpha$ | 1189 | CTD                                | 30  | 61 |
| 57                                      | $\alpha$ | 480 | 2 <sup>nd</sup> $\beta$ -propeller | $\alpha$ | 1189 | CTD                                | 30  | 65 |
| 58                                      | $\alpha$ | 583 | 2 <sup>nd</sup> $\beta$ -propeller | $\alpha$ | 997  | CTD                                | 21  | 62 |
| 59                                      | $\alpha$ | 526 | 2 <sup>nd</sup> $\beta$ -propeller | $\alpha$ | 997  | CTD                                | 21  | 61 |
| 60                                      | $\alpha$ | 583 | 2 <sup>nd</sup> $\beta$ -propeller | $\alpha$ | 1189 | CTD                                | 20  | 83 |
| 61                                      | $\alpha$ | 526 | 2 <sup>nd</sup> $\beta$ -propeller | $\alpha$ | 1189 | CTD                                | 15  | 82 |
| 62                                      | $\beta'$ | 10  | 1st $\beta$ -propeller             | $\beta'$ | 318  | 2 <sup>nd</sup> $\beta$ -propeller | 17  | 27 |
| 63                                      | $\beta'$ | 336 | 2 <sup>nd</sup> $\beta$ -propeller | $\beta'$ | 615  | $\alpha$ -solenoid                 | 15  | 23 |
| 64                                      | $\beta$  | 378 | trunk                              | $\beta$  | 932  | appendage                          | 54  | 43 |
| <b>Inter-domains and Inter-subunits</b> |          |     |                                    |          |      |                                    |     |    |
| 65                                      | $\alpha$ | 46  | 1 <sup>st</sup> $\beta$ -propeller | $\beta$  | 771  | appendage                          | 120 | 30 |
| 66                                      | $\alpha$ | 81  | 1 <sup>st</sup> $\beta$ -propeller | $\beta$  | 771  | appendage                          | 33  | 19 |
| 67                                      | $\alpha$ | 487 | 2 <sup>nd</sup> $\beta$ -propeller | $\beta$  | 949  | appendage                          | 67  | 28 |
| 68                                      | $\alpha$ | 526 | 2 <sup>nd</sup> $\beta$ -propeller | $\beta$  | 949  | appendage                          | 42  | 26 |
| 69                                      | $\alpha$ | 490 | 2 <sup>nd</sup> $\beta$ -propeller | $\beta$  | 949  | trunk                              | 38  | 23 |
| 70                                      | $\alpha$ | 46  | 1 <sup>st</sup> $\beta$ -propeller | $\delta$ | 14   | N-terminal                         | 99  | 27 |

|    |          |      |                                    |            |     |            |    |    |
|----|----------|------|------------------------------------|------------|-----|------------|----|----|
| 71 | $\alpha$ | 46   | 1 <sup>st</sup> $\beta$ -propeller | $\delta$   | 38  | N-terminal | 32 | 33 |
| 72 | $\beta'$ | 336  | 2 <sup>nd</sup> $\beta$ -propeller | $\beta$    | 362 | trunk      | 33 | 25 |
| 73 | $\beta'$ | 615  | $\alpha$ -solenoid                 | $\beta$    | 361 | trunk      | 28 | 30 |
| 74 | $\beta'$ | 615  | $\alpha$ -solenoid                 | $\beta$    | 362 | trunk      | 47 | 31 |
| 75 | $\beta$  | 932  | appendage                          | $\delta$   | 44  | N-terminal | 19 | 60 |
| 76 | $\beta$  | 534  | trunk                              | $\zeta$    | 39  | core       | 15 | 31 |
| 77 | $\beta$  | 535  | trunk                              | $\zeta$    | 39  | core       | 17 | 35 |
| 78 | $\gamma$ | 313  | trunk                              | $\zeta$    | 51  | core       | 46 | 31 |
| 79 | $\alpha$ | 238  | 1 <sup>st</sup> $\beta$ -propeller | $\epsilon$ | 42  | core       | 21 | 87 |
| 80 | $\alpha$ | 238  | 1 <sup>st</sup> $\beta$ -propeller | $\epsilon$ | 278 | core       | 17 | 94 |
| 81 | $\alpha$ | 350  | 2 <sup>nd</sup> $\beta$ -propeller | $\epsilon$ | 42  | core       | 16 | 66 |
| 82 | $\alpha$ | 1002 | C-terminal                         | $\epsilon$ | 167 | core       | 77 | 40 |



**Table S3. Identified cross-linked residues within F-subcomplex and their Ca-Ca distance measured in four structural models with different conformations (Distances greater than the cut-off value of 45 Å are colored in red).**

| No.                  | Subunit 1 | AA  | Domain 1   | Subunit 2 | AA  | Domain2    | models for distance measure |               |                     |                     |
|----------------------|-----------|-----|------------|-----------|-----|------------|-----------------------------|---------------|---------------------|---------------------|
|                      |           |     |            |           |     |            | AP-1 locked                 | AP-1 unlocked | AP-1 hyper unlocked | coatomer hyper open |
| <b>Intra-subunit</b> |           |     |            |           |     |            |                             |               |                     |                     |
| 1                    | β         | 36  | trunk      | β         | 43  | trunk      | 11                          | 11            | 10                  | 10                  |
| 2                    | β         | 501 | trunk      | β         | 535 | trunk      | 20                          | 20            | 19                  | 25                  |
| 3                    | β         | 361 | trunk      | β         | 366 | trunk      | 8                           | 9             | 9                   | 9                   |
| 4                    | β         | 501 | trunk      | β         | 534 | trunk      | 19                          | 18            | 18                  | 26                  |
| 5                    | β         | 32  | trunk      | β         | 37  | trunk      | 7                           | 7             | 7                   | 7                   |
| 6                    | γ         | 514 | trunk      | γ         | 538 | trunk      | 25                          | 31            | 30                  | 17                  |
| 7                    | γ         | 465 | trunk      | γ         | 540 | trunk      | 28                          | 29            | 21                  | 23                  |
| 8                    | γ         | 145 | trunk      | γ         | 175 | trunk      | 14                          | 11            | 11                  | 11                  |
| 9                    | γ         | 175 | trunk      | γ         | 213 | trunk      | 17                          | 18            | 18                  | 15                  |
| 10                   | γ         | 262 | trunk      | γ         | 300 | trunk      | 17                          | 23            | 22                  | 13                  |
| 11                   | γ         | 205 | trunk      | γ         | 238 | trunk      | 16                          | 36            | 38                  | 16                  |
| 12                   | γ         | 238 | trunk      | γ         | 313 | trunk      | 15                          | 31            | 34                  | 16                  |
| 13                   | γ         | 604 | appendage  | γ         | 818 | appendage  | /                           | /             | /                   | 35                  |
| 14                   | δ         | 14  | NTD        | δ         | 38  | NTD        | 17                          | 17            | 16                  | 9                   |
| 15                   | δ         | 335 | μ homology | δ         | 363 | μ homology | 6                           | 14            | 6                   | 15                  |
| 16                   | δ         | 335 | μ homology | δ         | 347 | μ homology | 17                          | 12            | 11                  | 12                  |
| 17                   | δ         | 322 | μ homology | δ         | 335 | μ homology | 15                          | 17            | 17                  | 19                  |
| 18                   | δ         | 281 | μ homology | δ         | 363 | μ homology | 12                          | 11            | 11                  | 12                  |
| 19                   | δ         | 322 | μ homology | δ         | 476 | μ homology | 9                           | 8             | 26                  | 19                  |
| 20                   | δ         | 448 | μ homology | δ         | 476 | μ homology | 17                          | 18            | 17                  | 19                  |
| <b>Inter-subunit</b> |           |     |            |           |     |            |                             |               |                     |                     |
| 21                   | β         | 534 | trunk      | ζ         | 39  | core       | 60                          | 49            | 37                  | 31                  |
| 22                   | β         | 535 | trunk      | ζ         | 39  | core       | 61                          | 51            | 39                  | 35                  |
| 23                   | γ         | 313 | trunk      | ζ         | 51  | core       | 23                          | 23            | 33                  | 31                  |
| 24                   | β         | 932 | appendage  | δ         | 44  | N-terminal | /                           | /             | /                   | 60                  |
